# Supplementary material for: Pitfalls in quantifying exploration in reward-based motor learning and how to avoid them
Source: PubMed Central journal article supplement (PMC8382626; doi:10.1007/s00422-021-00884-8), 2021-08-02
Supplement: 422_2021_884_MOESM2_ESM.pdf [file 422_2021_884_MOESM2_ESM.pdf]

## Supplementary information 4 Trial-to-trial changes in motor noise and exploration following success

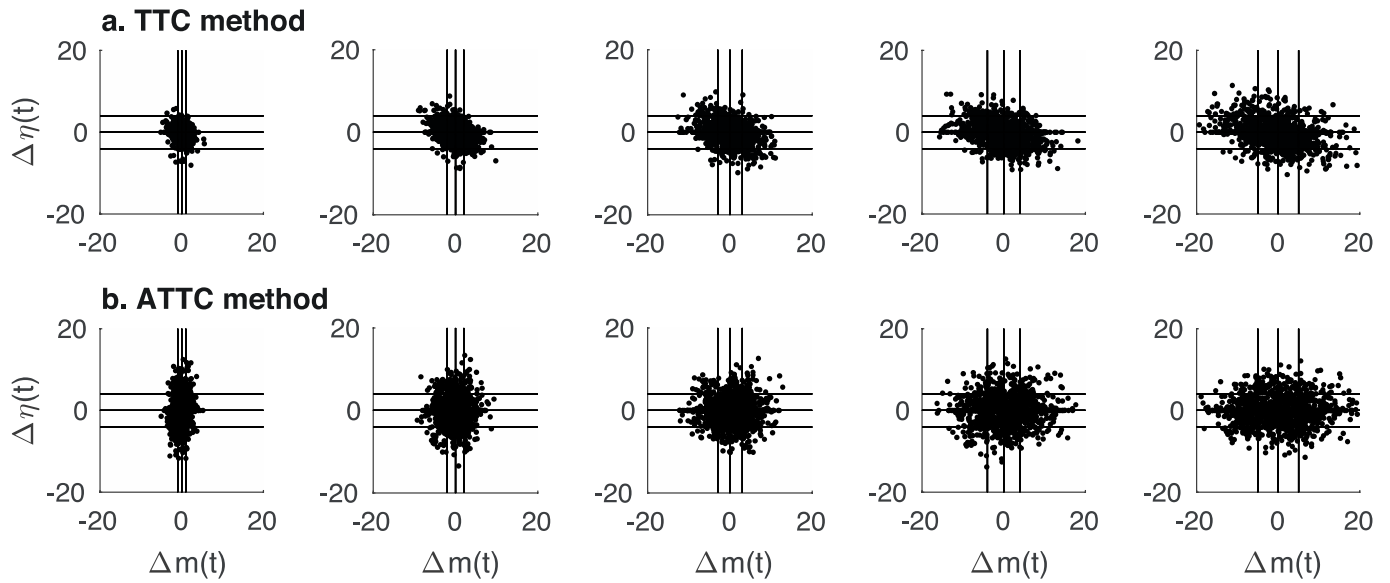

**Fig. 11** Trial-to-trial changes in motor noise and exploration following success. Trial-to-trial changes in motor noise and exploration following success. Changes in draws of motor noise and exploration following successful trials. The first five simulations of a simulation set of the Therrien16 model, a random reward criterion and default exploration ( $\sigma_{\eta^*}^2 = 16$ ) have been plotted for increasing values of motor noise. Dotted lines indicate  $\pm\sigma$
